# Supplementary material
Source: PubMed Central journal article supplement (PMC11236777)
Supplement: ajcr0014-2731-f14.pdf [file ajcr0014-2731-f14.pdf]

## LGG prognosis and immunotherapy with FAM features

**Table S1.** List of 67 fatty acid metabolism genes related to LGG prognosis

| gene      | p           | HR     | high_0.95   | low_0.95    |
|-----------|-------------|--------|-------------|-------------|
| SERINC1   | 7.88E-05    | 0.4842 | 0.694082373 | 0.337829585 |
| LGALS1    | 8.59E-05    | 2.052  | 2.936972878 | 1.433368098 |
| APEX1     | 0.008127821 | 0.6196 | 0.883191688 | 0.434650017 |
| ENO2      | 0.005980932 | 0.6066 | 0.866341333 | 0.424677934 |
| PRDX6     | 5.55E-05    | 2.138  | 3.093908248 | 1.477634818 |
| ECHS1     | 0.004910158 | 0.6003 | 0.856633174 | 0.420651276 |
| S100A10   | 0.011947166 | 1.585  | 2.270758303 | 1.106842396 |
| HSD17B10  | 0.003676042 | 1.7    | 2.431486895 | 1.188332125 |
| EPHX1     | 0.003169244 | 0.5816 | 0.833596106 | 0.405742451 |
| MDH2      | 0.018185849 | 1.539  | 2.200340131 | 1.076082225 |
| HADHB     | 6.21E-07    | 0.3837 | 0.559222035 | 0.263302356 |
| ACADVL    | 0.001317938 | 1.815  | 2.610338681 | 1.261471001 |
| ALDH9A1   | 1.64E-06    | 0.4063 | 0.587192744 | 0.281136736 |
| FASN      | 0.005849976 | 0.6076 | 0.865969977 | 0.426359594 |
| GABARAPL1 | 0.008082313 | 0.6179 | 0.882350595 | 0.432732333 |
| CA2       | 3.82E-05    | 2.161  | 3.119179351 | 1.497696333 |
| ADIPOR2   | 0.019975686 | 0.6588 | 0.936314807 | 0.463496155 |
| ERP29     | 0.00017704  | 2      | 2.872934192 | 1.392085851 |
| FH        | 0.045416457 | 1.433  | 2.038096351 | 1.007363823 |
| IDH3G     | 0.013823864 | 0.6367 | 0.91208269  | 0.444487468 |
| LDHA      | 0.000897995 | 1.862  | 2.68751811  | 1.290134657 |
| SMS       | 4.58E-12    | 4.164  | 6.236927975 | 2.7794617   |
| IDI1      | 0.000105879 | 0.4731 | 0.690719613 | 0.324084552 |
| CBR1      | 0.000182389 | 1.981  | 2.834163471 | 1.384871207 |
| SUCLG1    | 0.00247872  | 0.5704 | 0.820552796 | 0.396502117 |
| UROD      | 0.000575881 | 1.892  | 2.719066943 | 1.31590967  |
| IDH1      | 0.006874545 | 1.635  | 2.33423103  | 1.144600498 |
| RETSAT    | 0.000210599 | 1.999  | 2.883969793 | 1.385954701 |
| GRHPR     | 0.004381453 | 0.5958 | 0.850760489 | 0.417274102 |
| OSTC      | 9.71E-06    | 2.324  | 3.377856722 | 1.599611402 |
| PCBD1     | 0.001970051 | 1.762  | 2.522543993 | 1.230865441 |
| ACO2      | 0.000816378 | 0.5303 | 0.768849233 | 0.365811256 |
| ACAT2     | 0.013898593 | 0.6351 | 0.911863814 | 0.442313357 |
| PDHB      | 0.006202128 | 0.6046 | 0.866882094 | 0.421643381 |
| HSD17B11  | 0.03079743  | 1.486  | 2.128266617 | 1.037295222 |
| ACADM     | 0.003747014 | 1.699  | 2.430748715 | 1.187213858 |
| REEP6     | 0.001035862 | 0.5427 | 0.781916851 | 0.376737379 |
| ACSL1     | 8.96E-06    | 2.28   | 3.280028366 | 1.584696007 |
| ACSL4     | 0.029783875 | 0.6764 | 0.962405679 | 0.475417954 |
| CA4       | 0.003529502 | 0.5858 | 0.839027792 | 0.40898334  |
| HCCS      | 0.000119059 | 2.083  | 3.02645642  | 1.433322282 |
| CPOX      | 0.015677673 | 1.545  | 2.197968069 | 1.085592276 |
| CRYZ      | 0.00014918  | 2.031  | 2.929703156 | 1.408348089 |
| HMGCL     | 0.003337298 | 1.714  | 2.455290339 | 1.195898789 |
| ACOT8     | 0.023426147 | 1.507  | 2.149289514 | 1.057046809 |
| AADAT     | 0.00125954  | 0.5424 | 0.786640687 | 0.373966578 |
| ACADS     | 2.78E-06    | 2.376  | 3.411498891 | 1.654362677 |

## LGG prognosis and immunotherapy with FAM features

|         |             |        |             |             |
|---------|-------------|--------|-------------|-------------|
| UROS    | 7.49E-06    | 0.4187 | 0.612809699 | 0.286031227 |
| ACAA2   | 4.29E-05    | 2.139  | 3.079332147 | 1.486027714 |
| MCEE    | 0.02265018  | 0.6562 | 0.942691126 | 0.456806345 |
| PTS     | 0.007821011 | 1.623  | 2.319844193 | 1.135940913 |
| PPARA   | 0.004621787 | 0.5964 | 0.852841452 | 0.41707081  |
| ACSL5   | 0.02286463  | 1.519  | 2.177357715 | 1.05971539  |
| GOS2    | 0.002222175 | 1.747  | 2.498234288 | 1.221970354 |
| CBR3    | 7.80E-06    | 2.307  | 3.328902337 | 1.59926889  |
| MLYCD   | 0.032091822 | 0.6787 | 0.967391659 | 0.476108144 |
| CPT2    | 0.001309787 | 1.824  | 2.631090286 | 1.264210685 |
| INMT    | 0.012691433 | 1.569  | 2.237164313 | 1.101064027 |
| IL4I1   | 0.00032219  | 1.946  | 2.797378512 | 1.35393045  |
| CEL     | 0.00327788  | 1.714  | 2.45585706  | 1.196932292 |
| ACADL   | 0.001132692 | 1.817  | 2.602565899 | 1.268164243 |
| CIDEA   | 0.037383229 | 0.6839 | 0.978049033 | 0.478187084 |
| ALDH3A1 | 5.47E-06    | 2.335  | 3.365542685 | 1.619895409 |
| CYP1A1  | 0.000452023 | 0.5236 | 0.751659329 | 0.364769517 |
| HMGCS2  | 0.00164641  | 0.5619 | 0.804550937 | 0.392474078 |
| AQP7    | 3.69E-05    | 0.4556 | 0.661867057 | 0.313620147 |
| ACSM3   | 0.00407763  | 1.691  | 2.420188405 | 1.18156535  |
